1 Antioxidant defense and stress protein induction following heat stress in the Mediterranean  
2 snail *Xeropicta derbentina* [Pulmonata, Hygromiidae]

3

4

5 Sandra Troschinski, Andreas Dieterich, Stefanie Kraus, Rita Triebkorn and Heinz-R. Köhler

6

7

8 Animal Physiological Ecology, Institute of Evolution and Ecology, Tübingen University,

9 72072 Tübingen, Germany

## 10 Abstract

11

12 The Mediterranean snail *Xeropicta derbentina*, being highly abundant in Southern France, has  
13 the need for efficient physiological adaptations to desiccation and over-heating posed by dry  
14 and hot environmental conditions. In consequence of heat, oxidative stress manifests in these  
15 organisms, which, in turn, leads to the formation of reactive oxygen species (ROS). In this  
16 study, we focused on adaptations on the biochemical level by investigation of antioxidant  
17 defenses and heat shock protein 70 (Hsp70) induction, both essential mechanisms of the heat  
18 stress response. We exposed snails to elevated temperature (25, 38, 40, 43, and 45°C) in the  
19 laboratory and measured the activity of the antioxidant enzymes catalase (CAT) and  
20 glutathione peroxidase (GPx), determined the Hsp70 level, and quantified lipid peroxidation.  
21 In general, we found a high constitutive level of CAT activity in all treatments, which may be  
22 interpreted as a permanent protection against ROS, i.e. hydrogen peroxide. CAT and GPx  
23 showed temperature-dependent activities: CAT activity was significantly increased in  
24 response to high temperatures (43 and 45°C), whereas GPx exhibited a significantly increased  
25 activity at 40°C, likely in response to high levels of lipid peroxides which already occurred in  
26 the 38°C treatment. Hsp70 showed a maximum induction at 40°C, followed by a decrease at  
27 higher temperatures. Our results reveal that *X. derbentina* possesses a set of efficient  
28 mechanisms to cope with damaging effects by heat. Furthermore, we could demonstrate that,  
29 beside the well documented Hsp70 stress response, the antioxidant defense plays a crucial  
30 role in these snails competence to survive extreme temperatures.

31

32

33 Keywords: catalase, glutathione peroxidase, Hsp70, stress response, oxidative stress

34

35

## 36 Introduction

37

38 In the Mediterranean climate, which is characterized by dry and hot summers, animals need  
39 particular adaptations to ensure survival under extreme environmental conditions. Especially  
40 terrestrial snails with their water-permeable skin (Machin, 1964) and their external shell easily  
41 face the risk of desiccation and over-heating. One example is the pulmonate land snail  
42 *Xeropicta derbentina* (Krynicky, 1836), which occurs in high numbers in southern France.  
43 These snails possess special behavioral and physiological adaptations to their habitat:

44 climbing on vegetation to escape from hot ground temperatures or shifting activity phases to  
45 favorable time periods (Pomeroy, 1968; Yom-Tov, 1971) can be seen as behavioral  
46 adaptations whereas aestivation attended by metabolic depression (Guppy and Withers, 1999;  
47 Bishop and Brand, 2000; Storey, 2002) during periods of extreme dry conditions is an  
48 example for a physiological mechanism of adaptation. Furthermore, there are different  
49 mechanisms acting on the biochemical level, which are known to play an important role in the  
50 thermotolerance of animals.

51 One of these mechanisms is the antioxidant defense, which plays a crucial role in periods of  
52 oxidative stress, e.g. caused by heat overload. This stress status occurs whenever there is an  
53 overproduction of reactive oxygen species (ROS) due to an imbalance between ROS  
54 formation and ROS detoxification (Sies, 1994; Sies, 1997). These ROS have deleterious  
55 effects on DNA, proteins, and lipids (Halliwell and Gutteridge, 1989; Halliwell, 2006),  
56 leading to functional alterations in cells and tissues. The oxidation of polyunsaturated fatty  
57 acids by ROS is known as ‘lipid peroxidation’ (Gutteridge, 1995), leading to the formation of  
58 lipid peroxides and, consequently, to the impairment of biomembranes (Gutteridge and  
59 Halliwell, 1990). The lipid peroxidation process can be determined by quantification of lipid  
60 peroxides via the ferrous oxidation xylenol orange method (FOX assay) (Hermes-Lima et al.,  
61 1995; Monserrat et al., 2003), functioning as tool to assess the extent of oxidative damage an  
62 organism had experienced due to oxidative stress.

63 Aerobic organisms must deal with the continuous generation of ROS as byproducts of  
64 metabolism (Halliwell and Gutteridge, 1989). These products are molecules derived from  
65 molecular oxygen and include the superoxide anion radical ( $\text{O}_2^-$ ), hydrogen peroxide ( $\text{H}_2\text{O}_2$ ),  
66 and the hydroxyl radical ( $\cdot\text{OH}$ ), the latter being highly reactive and most destructive  
67 (Pannunzio and Storey, 1998). To minimize their destructive action, ROS should be rapidly  
68 eliminated. All cells possess constitutive antioxidant defences, which include enzymes and  
69 small molecules that detoxify or scavenge ROS (Halliwell and Gutteridge, 1989). Enzymes  
70 that directly degrade ROS include: (i) superoxide dismutase (SOD), which catalyses the  
71 dismutation of superoxide into hydrogen peroxide and oxygen, (ii) catalase (CAT), which  
72 degrades hydrogen peroxide, and (iii) glutathione peroxidase (GPx), which degrades  
73 hydrogen peroxide and also lipid peroxides generated by lipid peroxidation (Aebi, 1984;  
74 Halliwell and Gutteridge, 1989; Gutteridge, 1995). Beside these enzymes there are much  
75 more antioxidants acting as free radical scavengers or substrates (e.g. the most important one  
76 is reduced glutathione (GSH)) involved in the detoxification of hydroperoxides, or other  
77 enzymes like glutathione reductase (GR) or glutathione-S-transferase (GST), which

78 additionally need reduced glutathione as a cofactor for their activity (Meister, 1988;  
79 Pannunzio and Storey, 1998; Radwan et al., 2010).  
80 The activation of antioxidant defenses is an essential factor in protecting an organism from  
81 cellular damage when environmental conditions become deleterious. Changes in the activities  
82 of antioxidant enzymes have been found in many organisms in response to anoxia (Hermes-  
83 Lima and Storey, 1993, 1996; Pannunzio and Storey, 1998; Lushchak et al., 2001), freezing  
84 (Hermes-Lima and Storey, 1993; Joanisse and Storey, 1996), and also heat stress (Heise et al.,  
85 2006; Lushchak and Bagnyukova, 2006a; Verlecar et al., 2007). An increase in antioxidants  
86 during aestivation in snails (Hermes-Lima et al., 1998; Ramos-Vasconcelos and Hermes-  
87 Lima, 2003; Nowakowska et al., 2009) has also been shown. Furthermore, the application of  
88 oxidative stress indices can be used as biomarker of environmental pollution (Jena et al.,  
89 2009; Luna-Acosta et al., 2010; Radwan et al., 2010).

90  
91 Another efficient mechanism to cope with the action of elevated temperature is the heat-shock  
92 protein 70 (Hsp70) protection system, comprising chaperones with a molecular weight of  
93 about 70kD. Heat shock proteins are phylogenetically highly conserved and abundant  
94 throughout almost all organisms investigated so far (Lindquist and Craig, 1988; Feder and  
95 Hofmann, 1999). It is known that Hsps are synthesized in response to a wide range of  
96 stressors, not only heat (Lindquist, 1986; Parsell and Lindquist, 1993). Under conditions of  
97 homeostasis, Hsp70 is expressed constitutively mainly functions in assisting newly  
98 synthesized proteins in their correct folding. Besides this chaperoning function, Hsp70 plays  
99 an essential role in the intracellular trafficking, degradation and localization of proteins  
100 (Hendrick and Hartl, 1993; Fink, 1999; Mayer and Bukau, 2005). Under stressful conditions,  
101 the Hsp70 level can be up-regulated by an intensified expression of the corresponding genes  
102 in the context of which an elevated intracellular level of malfolded or degraded protein is seen  
103 as a trigger for this up-regulation (Parsell and Lindquist, 1993; Morimoto, 1998; Feder and  
104 Hofmann, 1999; Kregel, 2002; Mayer and Bukau, 2005). Hence, Hsp70 has frequently been  
105 used as a marker of proteotoxic effect, as a direct link between the consequences of heat  
106 exposure and the resulting Hsp70 level in different organisms (Feder and Hofmann, 1999;  
107 Sørensen et al., 2001; Daugaard et al., 2007). In the case of the Mediterranean land snail  
108 *Xeropicta derbentina*, elevated Hsp70 levels in response to heat exposure have been found in  
109 a number of recent studies (Köhler et al., 2009; Scheil et al., 2011; Dieterich et al., 2013; Di  
110 Lellis et al., 2014; Troschinski et al., 2014).

111 Together with the antioxidant defense system, the Hsp70 defense system is supposed to form  
112 a well-working mechanism that ensures survival in a challenging habitat. However, to date,  
113 only little is known about the interaction and the respective role of these two defense  
114 mechanisms in the context of heat-tolerance in snails, i.e. in *X. derbentina*.

115 In an earlier study (Dieterich et al., 2014), we conducted heat exposure experiments with the  
116 result of a clear decrease of lipid peroxides at a distinct temperature (43°C) in *X. derbentina*,  
117 which brought us to the hypothesis that this effect might be due to an activation of the  
118 antioxidant defense machinery. Here, we investigate the effects of different temperatures on  
119 the activity of the two enzymes catalase and glutathione peroxidase as representatives of the  
120 antioxidant defense system, by exposing snails of the species *X. derbentina* to different heat  
121 exposure regimes (25, 38, 40, 43, and 45°C) in the laboratory. In addition, we also determined  
122 lipid peroxidation levels (as a marker for oxidative stress) and the 70kDa heat-shock protein,  
123 Hsp70. Furthermore, we aimed at assessing the role of the antioxidant defense mechanism in  
124 this snail's ability to counteract high temperatures. Thus, we investigated, for the first time,  
125 the interplay between the antioxidant defense system and the Hsp70 response in this context.

126

127

## 128 **Results**

129

### 130 **Catalase**

131 The catalase activity was generally very high in our samples (dilution 1:2000). A highly  
132 significant increase of catalase activity compared to control level (25°C) was detected after  
133 exposure to 43 and 45°C (Fig.1). This increase in the 43°C group was also significantly  
134 different from 38°C and highly significantly different from 40°C. A slightly significant and a  
135 highly significant increase of catalase activity compared to 38 and 40°C, respectively, was  
136 observed after exposure to 45°C.

137

### 138 **Glutathione peroxidase**

139 The enzyme glutathione peroxidase showed maximum activity in the 40°C treatment (Fig.2).  
140 This elevation was slightly significant vs.25°C and highly significant vs. 38°C. The decrease  
141 in activity at higher temperatures (43 and 45°C) was also significant compared to 40°C.

142

143 Non-linear regression analysis of catalase and glutathione peroxidase activities vs.

144 temperature illustrates different responses of these enzymes to changes in temperature:

145 catalase activity has a sigmoidal shaped curve while glutathione peroxidase activity has a  
146 clear peak at 40°C (Fig.3).

147

#### 148 Lipid peroxidation

149 We found the highest level of lipid peroxides after exposure to 38°C (Fig.4). This slightly  
150 significant (vs. 25°C) elevation in lipid peroxidation was followed by a decrease at higher  
151 temperature (40 to 45°C). In the 43 and 45° C treatment the levels of lipid peroxidation  
152 decreased in a slightly significant way, compared to the exposure at 38°C.

153

#### 154 Hsp70

155 We observed a distinct stress protein response in the snails after exposure to elevated  
156 temperature (Fig.5). The levels of Hsp70 increased up to their maximum induction at 40°C  
157 followed by a decrease at higher temperatures, particularly at 45°C where the Hsp70 level  
158 decline became significant.

159

160

### 161 Discussion

162

163 Terrestrial snails inhabiting dry and hot habitats experience daily periods of high temperatures  
164 due to the absorbance of solar radiation. The pulmonate *Xeropicta derbentina* is a well  
165 adapted organism to such unfavorable conditions. Thus, this snail species had become a  
166 common object for the investigation of physiological heat stress responses in the last years  
167 (Dittbrenner et al., 2009; Köhler et al., 2009; Scheil et al., 2011; Di Lellis et al., 2012;  
168 Dieterich et al., 2013; Di Lellis et al., 2014; Troschinski et al., 2014). In contrast to the well-  
169 documented induction of heat-shock proteins in response to heat exposure, the activation of  
170 the antioxidant defense system is poorly understood in this context in this terrestrial snail  
171 species.

172 In the present study, we succeed to replicate our results from our previous investigation  
173 (Dieterich et al., 2014). We found an increase in lipid peroxides (as an index for oxidative  
174 stress) after exposure to 38°C followed by an unexpected decrease at higher temperatures. To  
175 test the hypothesis that an activation of antioxidant mechanisms is responsible for this effect,  
176 we measured catalase (CAT) and glutathione peroxidase (GPx) activity as two enzymatic  
177 representatives of the antioxidant defense system.

178 In general, we found a very high CAT activity in all treatments, particularly in contrast to the  
179 overall activity of GPx, which was quite low. We suggest that this generally high CAT  
180 activity can be seen as a constitutive base level of this enzyme which might have a permanent  
181 protection against the cytotoxic action of hydrogen peroxide (H<sub>2</sub>O<sub>2</sub>) in *X. derbentina*. The  
182 same conclusion was proposed by Nowakowska et al. (2011) in the context of relatively high  
183 CAT activity during aestivation/arousal cycles in Helicidae. Furthermore, Storey (1996)  
184 demonstrated that anoxic-tolerant organisms that experience bursts of ROS generation during  
185 the anoxic to aerobic transition ( facultative anaerobes as, e.g., freshwater turtles) maintain  
186 high levels of antioxidant enzymes and glutathione constitutively. He described this  
187 phenomenon as a strategy to face any stress effectively. In addition, he found generally high  
188 antioxidant enzyme activities in tissues of the land snail *Otala lactea*, which is indicative for a  
189 good constitutive ability for dealing with ROS formation. This, in turn, confirms the  
190 assumption that a permanent antioxidant defense is a crucial mechanism to counteract  
191 repetitive periods of oxidative stress (Storey, 1996).

192 We used the determination of lipid peroxides via FOX assay as index for oxidative stress.  
193 When we compare the levels of lipid peroxides with the observed levels of antioxidant  
194 enzyme activity in the different temperature treatments, a clear physiological response is  
195 obvious: after exposure to 38°C, we detected an increase in lipid peroxides which was  
196 followed by an increased activity of GPx in the 40°C treatment. In consequence to this  
197 elevated enzyme activity, the level of lipid peroxides decreased. After exposure to 43 and  
198 45°C, we measured a significant increase of CAT activity associated with low lipid peroxide  
199 levels which is indicative for the highly effective work of this enzyme against the reactive  
200 oxygen species H<sub>2</sub>O<sub>2</sub>. Furthermore, the increase of CAT activity was also associated with a  
201 decrease in activity of GPx. Our data suggest that, here in our artificial heat exposure  
202 experiment, GPx has its activity optimum at 40°C, whereby CAT activity remains unaffected  
203 staying on its 'base level'. But when exceeding this temperature, reaching 43 and 45°C, a  
204 boost in CAT activity, associated with a decrease in GPx activity, lead to a reduction of  
205 damaging effects of H<sub>2</sub>O<sub>2</sub> (mirrored by low lipid peroxide levels). This phenomenon reflects a  
206 competition between CAT and GPx for the same reactive oxygen species (ROS), since both  
207 enzymes degrade H<sub>2</sub>O<sub>2</sub>. In a study by Nowakowska et al. (2011), this competing action  
208 between CAT and GPx could also be demonstrated in two molluscan species (*Helix aspersa*  
209 and *Helix pomatia*): here, extremely low levels of CAT activity were usually associated with  
210 extremely high activities of GPx.



211 Our data show that GPx activity was elevated in response to increased levels of lipid  
212 peroxides, leading us to the assumption that the enzyme activity must be stimulated by high  
213 levels of lipid peroxides (as the result of oxidative damage) . This implication is supported by  
214 a study of Ramos-Vasconcelos and Hermes-Lima (2003) who pointed out that increased  
215 levels of lipid peroxides in the hepatopancreas of the pulmonate land snail *Helix aspersa*  
216 could be a triggering factor for the activation of signaling pathways leading to the activation  
217 of GPx biosynthesis and/or maintenance of other enzymatic antioxidants in general.  
218 In the last years, several studies demonstrated that antioxidants, i.e. catalase and GPx, play an  
219 important role during aestivation as a mechanism of preparation for the oxidative stress that  
220 accompanies arousal in snails (Hermes-Lima and Storey, 1995; Storey, 1996; Hermes-Lima et  
221 al., 1998; Storey, 2002; Ramos-Vasconcelos and Hermes-Lima, 2003; Nowakowska et al.,  
222 2009; Nowakowska et al., 2010; Nowakowska et al., 2011). Beside this well-documented  
223 phenomenon and the role of the antioxidant defense system in this context, it is generally  
224 known that heat can induce oxidative stress. An increase in temperature stimulates all  
225 metabolic processes, for example it elevates oxygen consumption which can result in  
226 oxidative stress due to an increase in ROS as by-products during intensified metabolism  
227 (Storey, 1996; Lushchak, 2011). The induction of oxidative stress due to elevated  
228 environmental temperature was shown in several organisms (Heise et al., 2006; Lushchak and  
229 Bagnyukova, 2006b, a; Bagnyukova et al., 2007b; Verlecar et al., 2007; Bocchetti et al.,  
230 2008) and was associated with an increase in antioxidants (Bagnyukova et al., 2006;  
231 Lushchak and Bagnyukova, 2006a; Bagnyukova et al., 2007a). For example, in the mussel  
232 *Perna viridis*, increased activities of CAT and GPx (beside other antioxidants) were recorded  
233 (Verlecar et al., 2007). In the present study, we could demonstrate that terrestrial snails  
234 undergo oxidative stress as a result of elevated temperature which suggests the activation of  
235 physiological mechanisms to scavenge produced ROS. We could show that CAT and GPx  
236 activities were increased as enzymatic antioxidant defenses in a temperature-dependent, serial  
237 way of induction, indicating an essential role of antioxidants in the thermotolerance of *X.*  
238 *derbentina*.

239

240 Also the Hsp70 induction kinetics recorded here were in accordance with previous findings  
241 (Köhler et al., 2009; Di Lellis et al., 2014; Troschinski et al., 2014). In these studies the  
242 maximum Hsp70 level was observed at temperatures around 38 and 40°C applied for 8h,  
243 followed by a rapid Hsp70 decline when ambient temperature exceeded 40°C. Our data  
244 support these results, since we found a maximum heat shock protein induction at 40°C. The



245 significant decrease of the Hsp70 level, especially in the 45°C exposure group, is assumed to  
246 be due to an overwhelmed stress protein machinery (destruction phase), which is in  
247 accordance with the kinetics of stress protein induction described by Eckwert et al. (1997).  
248 Molecular chaperones as the heat shock proteins are primary sensors of misfolded proteins  
249 and assist in refolding processes. Some isoforms of Hsp70 are stress-inducible proteins that  
250 repair damaged proteins and prevent protein aggregation. The regulation of the expression of  
251 Hsp70 in gastropods has been linked to different factors of the developmental or ecological  
252 level (Tomanek and Somero, 2002; Arad et al., 2010; Mizrahi et al., 2010). Furthermore, in *X.*  
253 *derbentina*, seasonal and intraspecific variations in the Hsp70 induction could be found  
254 leading to different survival strategies in *X. derbentina* populations (Dieterich et al., 2013;  
255 Troschinski et al., 2014). Generally, it is known that Hsp induction is used as an important  
256 survival strategy in land snails living under extreme environmental conditions (Mizrahi et al.,  
257 2010, 2012). In this context, heat shock proteins are essential for ‘repairing’ partly malfolded  
258 proteins due to damaging effects of ROS, so an up-regulation of these proteins may be  
259 important for an organisms’ cellular fitness (De Oliveira et al., 2005).

260 For a better understanding of the processes involved in the heat tolerance of *X. derbentina*, we  
261 investigated the interplay of Hsp70 and the antioxidant defense. It could already be shown  
262 that both, Hsps as well as the antioxidant defense, are included in the response to stress during  
263 cycles of aestivation and arousal in gastropods (Storey and Storey, 2011; Giraud-Billoud et  
264 al., 2013). However, protein biosynthesis is a costly process, especially under stressful  
265 conditions, and it is thought that Hsp70 expression is very energy-costly (Sanchez et al., 1992;  
266 Heckathorn et al., 1996; Köhler et al., 2000). Thus, it should be expected that only proteins  
267 relevant to the maintenance of life would show increased levels under extreme conditions.  
268 Our data show that these snails already reveal a rather high constitutive Hsp70 level which  
269 was elevated up to 40°C, but declined upon exposure to higher temperature treatments (43  
270 and 45°C). Here, first of all, the CAT activity was significantly elevated. One may argue that  
271 this effect can be due to an energetic trade-off between Hsp70 and antioxidants, in a way that,  
272 in consequence, energy is spend in biosynthesis of enzymatic antioxidants (here: CAT)  
273 instead of Hsp70. As suggested by Giraud-Billoud et al. (2013), antioxidants and chaperone-  
274 mediated protective mechanisms as the Hsp70 may work independently, but the activation of  
275 different stress response pathways is promoted by reactive metabolites of oxidative stress.  
276 Gorman et al. (1999) examined the hypothesis that ROS contribute to the induction of Hsps  
277 during stress response and found that the tested antioxidants caused a reduction or complete  
278 inhibition of Hsp induction. Since we found an elevated CAT activity associated with low

279 levels of lipid peroxides (indicative for reduced ROS levels) and also decreased Hsp70 levels,  
280 our observations strengthen this hypothesis.

281 It has to be mentioned that we just investigated a “snap-shot” of the biochemical heat  
282 response after 8 hours of exposure. A previous study showed *X. derbentina* to exhibit a  
283 maximum level of Hsp70 after two hours of exposure to 45°C, whereas, in a 25°C treatment,  
284 the maximum stress protein induction was reached after four hours of exposure (Scheil et al.,  
285 2011). Furthermore, the activity of antioxidant enzymes (CAT and SOD) and levels of  
286 glutathione in *Helix aspersa* were measured at different time points during awakening process  
287 after aestivation. Results indicated differences in the glutathione levels but none in enzyme  
288 activities (Ramos-Vasconcelos and Hermes-Lima, 2003). For further studies, it might be  
289 interesting to investigate different time points during heat exposure to get a more detailed  
290 picture of the physiological processes, especially of the antioxidant defense system, involved  
291 in the thermotolerance of terrestrial snails.

292

### 293 *Conclusions*

294 In the present study, we found support for our assumption that antioxidants are responsible for  
295 the decrease in lipid peroxides at high temperature. A boost of GPx activity at 40°C  
296 (associated with moderate CAT activity levels) followed by an increase of CAT activity at 43  
297 and 45°C (associated with a decrease in GPx activity) is likely to be responsible for this  
298 effect. These findings demonstrate efficient antioxidant defense mechanisms following heat  
299 exposure with different temperature-dependent boosts in activity. More precisely, we could  
300 show that CAT as well as GPx activities have different optima related to temperature thus  
301 complementing both one another and the Hsp70 response when external temperature  
302 increases.

303

304

### 305 **Material and Methods**

306

#### 307 *Test organism and sampling*

308

309 Individuals from a single population of the terrestrial snail, *Xeropicta derbentina*, were  
310 collected in the last week of May 2013 in Modène, Provence, Southern France. The sampling  
311 site was dry, open, and sun-exposed.

312 Snails were collected and kept in plastic containers (20.5 × 30 × 19.5 cm) in a density of  
313 approximately 200 individuals per box.

314

### 315 *Experimental setup*

316

317 In the laboratory, the snails were acclimatized to 25°C for 3 weeks. The plastic containers  
318 were filled with a layer of ground-cover material for terrariums (JBL, Terra Basis, Neuhofen,  
319 Germany). The snails were fed organic milk mash (Hipp, Pfaffenhofen, Germany) *ad libitum*  
320 and sprayed with water two times per week to assure an appropriate level of humidity.

321 The temperature experiments were conducted in heating cabinets using smaller plastic boxes  
322 (6.5 × 18 × 13 cm) lined with moist paper towels and covered with perforated plastic sheets.

323 Forty individuals were exposed as a group in individual plastic containers to temperatures of  
324 25, 38, 40, 43, and 45°C for 8h, respectively. 25°C was used as control temperature.

325 After eight hours of exposure, ten randomly selected individuals from each experimental  
326 group were taken for the CAT-assay (for catalase activity), the GPx-assay (for glutathione  
327 peroxidase activity), and the FOX-assay (for quantification of lipid peroxidation),

328 respectively. The snails were sacrificed and their shells were removed. For the stress protein  
329 analyses, ten individuals per group were individually shock-frozen in liquid nitrogen and  
330 stored at -20°C until further analysis.

331

332

### 333 *Catalase assay*

334

335 To measure the catalase activity in the samples, we used Cayman's Catalase Assay Kit (Item  
336 No. 707002, Cayman Chemical Company, Michigan, USA). The method is based on the  
337 reaction of catalase with methanol in presence of H<sub>2</sub>O<sub>2</sub>. Produced formaldehyde is measured  
338 calorimetrically with purpald (4-amino-3-hydrazino-5-mercapto-1,2,4-triazole) as the  
339 chromogen, which forms a bicyclic heterocycle with aldehydes and changes from colorless to  
340 a purple color upon oxidation.

341 The samples were weighed and homogenized in 5ml of ice-cold buffer (50mM potassium  
342 phosphate, pH 7.0, containing 1mM EDTA) per gram tissue, and centrifuged at 10,000 g for  
343 15 minutes at 4°C. Supernatants were removed and stored on ice. The assay was conducted in  
344 96-well plates.

345 Formaldehyde standard wells were prepared containing 100µl of assay buffer (100mM  
346 potassium phosphate, pH 7.0), 30µl of methanol, and 20µl of standard (concentrations 0, 5,  
347 15, 30, 45, 60, and 75µM formaldehyde) per well. Two positive control wells were filled with  
348 100µl of assay buffer, 30µl of methanol, and 20µl of catalase (control: bovine liver CAT).  
349 Sample wells were prepared in duplicates containing 100µl of assay buffer, 30µl of methanol,  
350 and 20µl of sample. Because the amount of catalase added to the well should result in an  
351 activity between 2-35nmol/min/ml, it was necessary to dilute the samples with sample buffer  
352 (1:2000).

353 To initiate reactions, 20µL of hydrogen peroxide solution was added to all wells and  
354 incubated on a shaker for 20 minutes at room temperature. After that, 30µl of potassium  
355 hydroxide (10M solution) was added to terminate the reaction. 30µl of purpald (in 0.5M  
356 hydrochloric acid) was added to all wells and incubated for 10 minutes. Then, 10µl of  
357 potassium periodate (in 0.5M potassium hydroxide) was added and again incubated for 5  
358 minutes. Absorbance was then read at 540nm using a spectrometer (Automated Microplate  
359 Reader, Elx8006, Bio Tek Instruments, Bio Tek Germany, Bad Friedrichshall, Germany).

360 Catalase activity was calculated using the following equation:

361 
$$\text{CAT activity [nmol/min/mg]} = [(\mu\text{M formaldehyde of sample}/20 \text{ min}) \times \text{sample}$$
  
362 
$$\text{dilution}]/1000$$

363

364

#### 365 *Glutathion peroxidase assay*

366

367 Glutathione peroxidase activity was measured by using Cayman's Glutathione Peroxidase  
368 Assay Kit (Item No. 703102, Cayman Chemical Company, Michigan, USA). GPx activity is  
369 measured indirectly by a coupled reaction with glutathione reductase (GR): oxidized  
370 glutathione (GSSG), which is produced upon reduction of hydroperoxide by GPx, is  
371 reconverted to its reduced state (GSH) by GR and NADPH. The oxidation of NADPH to  
372  $\text{NADP}^+$  in this reaction is accompanied by a decrease in absorbance at 340nm. The rate of  
373 decrease in  $A_{340}$  is directly proportional to the GPx activity in the sample. This assay  
374 integrates the activity of all glutathione-dependent peroxidases in the sample.

375 Samples were weighed and homogenized in 5ml of ice-cold buffer (50mM Tris-HCl, pH 7.5,  
376 5mM EDTA, and 1mM DTT) per gram tissue, and centrifuged at 10,000 g for 15 minutes at  
377 4°C. Supernatants were removed and stored on ice. The assay was conducted in 96-well  
378 plates. Background wells were filled with 120µl of assay buffer (50mM Tris-HCl, pH 7.6,

379 containing 5mM EDTA) and 50µl of co-substrate mixture (containing NADPH, glutathione,  
380 and glutathione reductase). 100µl of assay buffer, 50µl of co-substrate mixture, and 20µl of  
381 diluted GPx (control: bovine erythrocyte GPX) was added to the positive control wells.

382 Sample wells were prepared in triplicate containing 100µl of assay buffer, 50µl of co-  
383 substrate mixture, and 20µl of sample.

384 Reactions were initiated by adding 20µl of cumene hydroperoxide to all wells, and  
385 absorbance was read once every minute over a period of five minutes at 340nm using a  
386 microplate reader (Infinite M200, TECAN, Männedorf, Switzerland).

387 For each sample, the change in absorbance ( $\Delta A_{340}$ ) per minute was determined and GPX  
388 activity was calculated by the following equation:

389 GPx activity [nmol/min/mg] =  $[(\Delta A_{340}/\text{min})/0.000373\mu\text{M}^{-1}] \times (0.19\text{ml}/0.02\text{ml}) \times \text{sample}$   
390  $\text{dilution}]/1000$

391

392

393 *FOX-assay (quantification of lipid peroxides)*

394

395 In this study we conducted a modified FOX assay deriving from the method described by  
396 Hermes-Lima et al. (1995). The individuals were weighed and homogenized in ice-cold  
397 HPLC grade methanol (dilution 1:2; the required amount of methanol is calculated by: wet  
398 weight of the individual / density of methanol ( $0.791 \text{ g/cm}^3$ )), centrifuged at 15.000 g and 4°C  
399 for 5 minutes. Supernatants were stored at -80°C until further analysis. The assay was  
400 conducted using 96-well plates. In each well (except for the blank) 50µL of each reagent was  
401 added following this order: 0.25mM FeSO<sub>4</sub>, 25mM H<sub>2</sub>SO<sub>4</sub>, and 0.1mM xylene orange. Then,  
402 15µL of sample supernatant was added and the final sample volume adjusted to 200µL with  
403 aqua bidest. For each sample, three wells were prepared (3 replicates) and a mean value was  
404 calculated. Master blanks contained 200µL of aqua bidest.

405 Samples were incubated at room temperature for 180 minutes and absorbance was then read  
406 at 580nm ( $A_{580\text{nm}}$ ) using a photospectrometer (Automated Microplate Reader, Elx8006, Bio  
407 Tek Instruments, Bio Tek Germany, Bad Friedrichshall, Germany). After that time, 1µL of  
408 1mM cumenehydroperoxide (CHP) solution was added to the samples, incubated for 30  
409 minutes at room temperature and again read at 580nm ( $A_{580\text{nm}+\text{CHP}}$ ).

410 The content of lipid hydroperoxides in the samples is expressed as cumenehydroperoxide-  
411 equivalents per gram wet weight (CHPE / g wet weight) and was calculated according to the  
412 equation by Hermes-Lima et al. (1995):

413  $CHPE/g_{\text{wet weight}} = (A_{580\text{nm}}/A_{580\text{nm}+\text{CHP}}) * 1 \mu\text{L CHP}_{1\text{nmol}} * 200/V1 * 2$

414 where 200= total sample volume, V1=added sample supernatant volume (15  $\mu\text{L}$ ) and 2=  
415 dilution factor with methanol (1:2).

416

417

#### 418 *Hsp70 analysis*

419

420 Frozen individuals were homogenized on ice in extraction buffer (80mM potassium acetate,  
421 5mM magnesium acetate, 20mM HEPES and 2% protease inhibitor at pH 7.5) according to  
422 their body mass (2 $\mu\text{L}$  buffer/mg snail) and centrifuged for 10 minutes at 20,000  $g$  and 4°C. To  
423 determine the total protein content of each sample, the protein-dye binding assay of Bradford  
424 (1976) was used. Constant protein weights (40 $\mu\text{g}$  per sample) were separated by minigel  
425 SDS-PAGE (12% acrylamide, 0.12% bisacrylamide, 30 minutes at 80 V, and 75-90 minutes  
426 at 120 V) and transferred to nitrocellulose membranes by semi-dry blotting. The membranes  
427 were blocked in a 1:2 mixture of horse serum and TBS (50mM Tris, pH 5.7, 150 mM NaCl)  
428 for 2 hours. Subsequently, the membranes were incubated in the first antibody solution  
429 containing a monoclonal  $\alpha$ -Hsp70 antibody (mouse anti-human Hsp70, Dianova, Hamburg,  
430 Germany, dilution 1:5000 in 10% horse serum in TBS) on a lab shaker at room temperature  
431 overnight. After washing for 5 minutes in TBS, membranes were incubated in the second  
432 antibody solution (goat anti-mouse IgG conjugated to peroxidase, Jackson Immunoresearch,  
433 West Grove, PA, dilution 1:1000 in 10% horse serum/ TBS) on a lab shaker for 2 hours at  
434 room temperature. Following another washing step in TBS, the developed antibody complex  
435 was detected by staining with a solution of 1mM 4-chloro(1)naphthol, 0.015%  $\text{H}_2\text{O}_2$ , 30mM  
436 Tris pH 8.5, and 6% methanol. The optical volume (area of the bands [number of pixels]  $\times$   
437 average grey scale value after background subtraction) of the Western blot protein bands was  
438 quantified using a densitometric image analysis system (E.A.S.Y. Win 32, Herolab, Wiesloch,  
439 Germany). For each sample, data were related to an internal Hsp70 standard (extracted from  
440 *Theba pisana* snails) to assure comparability.

441

#### 442 *Statistics*

443

444 All data were checked for normality and homogeneity of variance using the D'Agostino

445 Omnibus Test and Levene's test. Data from catalase and FOX assay were transformed (square

446 root; log) to guarantee a normal distribution of the data. To detect significant differences  
447 within the treatments, we used ANOVA followed by the Tukey-Kramer HSD post-hoc test.  
448 Data were analyzed using JMP 9 (SAS Institute Inc., Cary, NC) and Microsoft Excel 2007  
449 (Microsoft Corporation, Redmond, USA).

450 Levels of significance were defined as:  $0.01 < P \leq 0.05$ : \* (slightly significant);  $0.001 < P \leq$   
451  $0.01$ : \*\* (significant);  $P \leq 0.001$ : \*\*\* (highly significant).

452  
453 Non-linear regression analysis of catalase and glutathione peroxidase activities vs.  
454 temperature was performed with Table Curve 2D 5.1 (Systat Software Inc., San José, USA).

455

456

### 457 **List of symbols and abbreviations**

458

|                               |                                         |
|-------------------------------|-----------------------------------------|
| CAT                           | catalase                                |
| DNA                           | deoxyribonucleic acid                   |
| FOX                           | ferrous oxidation xylenol orange method |
| GPx                           | glutathione peroxidase                  |
| GR                            | glutathione reductase                   |
| GSH                           | reduced glutathione                     |
| GST                           | glutathione S-transferase               |
| H <sub>2</sub> O <sub>2</sub> | hydrogen peroxide                       |
| Hsp70                         | 72 kDa heat shock protein               |
| Hsps                          | heat shock proteins                     |
| ·O <sub>2</sub> <sup>-</sup>  | superoxide anion radical                |
| ·OH                           | hydroxyl radical                        |
| ROS                           | reactive oxygen species                 |
| SOD                           | superoxide dismutase                    |

459

460

461

### 462 **Acknowledgements**

463 Thanks go to Bärbel Baum for technical support and Simon Schwarz for discussion and help  
464 with the statistics.

465



## Funding

This research received no specific grant from any funding agency in the public, commercial or not-for-profit sectors.

## References

- Aebi, H.** (1984). Catalase in vitro. *Methods Enzymol.* **105**, 121-126.
- Arad, Z., Mizrahi, T., Goldenberg, S. and Heller, J.** (2010). Natural annual cycle of heat shock protein expression in land snails: desert versus Mediterranean species of *Sphincterochila*. *J. Exp. Biol.* **213**, 3487-3495.
- Bagnyukova, T. V., Chahrak, O. I. and Lushchak, V. I.** (2006). Coordinated response of goldfish antioxidant defenses to environmental stress. *Aquat. Toxicol.* **78**, 325-331.
- Bagnyukova, T. V., Lushchak, O. V., Storey, K. B. and Lushchak, V. I.** (2007a). Oxidative stress and antioxidant defense responses by goldfish tissues to acute change of temperature from 3 to 23°C. *J. Therm. Biol.* **32**, 227-234.
- Bagnyukova, T. V., Danyliv, S. I., Zin'ko, O. S. and Lushchak, V. I.** (2007b). Heat shock induces oxidative stress in rotan *Perccottus glenii* tissues. *J. Therm. Biol.* **32**, 255-260.
- Bishop, T. and Brand, M.** (2000). Processes contributing to metabolic depression in hepatopancreas cells from the snail *Helix aspersa*. *J. Exp. Biol.* **203**, 3603-3612.
- Bocchetti, R., Lamberti, C. V., Pisanelli, B., Razzetti, E. M., Maggi, C., Catalano, B., Sesta, G., Martuccio, G., Gabellini, M. and Regoli, F.** (2008). Seasonal variations of exposure biomarkers, oxidative stress responses and cell damage in the clams, *Tapes philippinarum*, and mussels, *Mytilus galloprovincialis*, from Adriatic sea. *Mar. Environ. Res.* **66**, 24-26.
- Bradford, M. M.** (1976). A rapid and sensitive method for the quantitation of microgram quantities of protein utilizing the principle of protein-dye binding. *Anal. Biochem.* **72**, 248-254.
- Daugaard, M., Rohde, M. and Jäättelä, M.** (2007). The heat shock protein 70 family: Highly homologous proteins with overlapping and distinct functions. *FEBS letters* **581**, 3702-3710.

- 499 **De Oliveira, U. O., da Rosa Araújo, A. S., Belló-Klein, A., da Silva, R. S. and Kucharski,**  
500 **L. C.** (2005). Effects of environmental anoxia and different periods of reoxygenation on  
501 oxidative balance in gills of the estuarine crab *Chasmagnathus granulata*. *Comp. Biochem.*  
502 *Physiol. B* **140**, 51-57.
- 503 **Di Lellis, M. A., Seifan, M., Troschinski, S., Mazzia, C., Capowiez, Y., Tribskorn, R.**  
504 **and Köhler, H.-R.** (2012). Solar radiation stress in climbing snails: behavioural and intrinsic  
505 features define the Hsp70 level in natural populations of *Xeropicta derbentina* (Pulmonata).  
506 *Cell Stress Chaperones* **17**, 717-727.
- 507 **Di Lellis, M. A., Sereda, S., Geissler, A., Picot, A., Arnold, P., Lang, S., Troschinski, S.,**  
508 **Dieterich, A., Hauffe, T., Capowiez, Y. et al.** (2014). Phenotypic diversity, population  
509 structure and stress protein-based capacitors in populations of *Xeropicta derbentina*, a heat-  
510 tolerant land snail species. *Cell stress Chaperones*.
- 511 **Dieterich, A., Fischbach, U., Ludwig, M., Di Lellis, M., Troschinski, S., Gärtner, U.,**  
512 **Tribskorn, R. and Köhler, H.-R.** (2013). Daily and seasonal changes in heat exposure and  
513 the Hsp70 level of individuals from a field population of *Xeropicta derbentina* (Krynicky  
514 1836)(Pulmonata, Hygromiidae) in Southern France. *Cell Stress Chaperones* **18**, 405-414.
- 515 **Dieterich, A., Troschinski, S., Schwarz, S., Di Lellis, M. A., Henneberg, A., Fischbach,**  
516 **U., Ludwig, M., Gärtner, U., Tribskorn, R. and Köhler, H. R.** (2014). Hsp70 and lipid  
517 peroxide levels following heat stress in *Xeropicta derbentina* (Krynicky 1836) (Gastropoda,  
518 Pulmonata) with regard to different colour morphs. *Cell Stress Chaperones*, 1-10.
- 519 **Dittbrenner, N., Lazzara, R., Köhler, H.-R., Mazzia, C., Capowiez, Y. and Tribskorn,**  
520 **R.** (2009). Heat tolerance in Mediterranean land snails: histopathology after exposure to  
521 different temperature regimes. *J. Mollus. Stud.* **75**, 9-18.
- 522 **Eckwert, H., Alberti, G. and Köhler, H.-R.** (1997). The induction of stress proteins (hsp) in  
523 *Oniscus asellus* (Isopoda) as a molecular marker of multiple heavy metal exposure: I.  
524 Principles and toxicological assessment. *Ecotoxicology* **6**, 249-262.
- 525 **Feder, M. E. and Hofmann, G. E.** (1999). Heat-shock proteins, molecular chaperones, and  
526 the stress response: evolutionary and ecological physiology. *Ann. Rev. Physiol.* **61**, 243-282.
- 527 **Fink, A. L.** (1999). Chaperone-mediated protein folding. *Physiol. Rev.* **79**, 425-449.
- 528 **Giraud-Billoud, M., Vega, I. A., Tosi, M. E., Abud, M. A., Calderon, M. L. and Castro-**  
529 **Vazquez, A.** (2013). Antioxidant and molecular chaperone defences during estivation and  
530 arousal in the South American apple snail *Pomacea canaliculata*. *J. Exp. Biol.* **216**, 614-622.
- 531 **Gorman, A. M., Heavey, B., Creagh, E., Cotter, T. G. and Samali, A.** (1999). Antioxidant-  
532 mediated inhibition of the heat shock response leads to apoptosis. *FEBS letters* **445**, 98-102.

- 533 **Guppy, M. and Withers, P.** (1999). Metabolic depression in animals: physiological  
534 perspectives and biochemical generalizations. *Biol. Rev. Camb. Philos.* **74**, 1-40.
- 535 **Gutteridge, J.** (1995). Lipid peroxidation and antioxidants as biomarkers of tissue damage.  
536 *Clin. Chem.* **41**, 1819-1828.
- 537 **Gutteridge, J. M. C. and Halliwell, B.** (1990). The measurement and mechanism of lipid  
538 peroxidation in biological systems. *Trends Biochem. Sci.* **15**, 129-135.
- 539 **Halliwell, B.** (2006). Reactive species and antioxidants. Redox biology is a fundamental  
540 theme of aerobic life. *Plant Physiol.* **141**, 312-322.
- 541 **Halliwell, B. and Gutteridge, J.** (1989). Free radicals in Biology and Medicine: Clarendon  
542 Press, Oxford.
- 543 **Heckathorn, S. A., Poeller, G. J., Coleman, J. S. and Hallberg, R. L.** (1996). Nitrogen  
544 availability alters patterns of accumulation of heat stress-induced proteins in plants.  
545 *Oecologia* **105**, 413-418.
- 546 **Heise, K., Puntarulo, S., Nikinmaa, M., Abele, D. and Pörtner, H.-O.** (2006). Oxidative  
547 stress during stressful heat exposure and recovery in the North Sea eelpout *Zoarces viviparus*  
548 *L. J. Exp. Biol.* **209**, 353-363.
- 549 **Hendrick, J. P. and Hartl, F.** (1993). Molecular chaperone functions of heat-shock proteins.  
550 *Ann. Rev. Biochem.* **62**, 349-384.
- 551 **Hermes-Lima, M. and Storey, K. B.** (1993). Antioxidant defenses in the tolerance of  
552 freezing and anoxia by garter snakes. *Am. J. Physiol. Regul. Integr. Comp. Physiol.* **265**,  
553 R646-R652.
- 554 **Hermes-Lima, M. and Storey, K. B.** (1995). Antioxidant defenses and metabolic depression  
555 in a pulmonate land snail. *Am. J. Physiol. Regul. Integr. Comp. Physiol.* **268**, R1386-R1393.
- 556 **Hermes-Lima, M. and Storey, K. B.** (1996). Relationship between anoxia exposure and  
557 antioxidant status in the frog *Rana pipiens*. *Am. J. Physiol. Regul. Integr. Comp. Physiol.* **271**,  
558 R918-R925.
- 559 **Hermes-Lima, M., Willmore, W. G. and Storey, K. B.** (1995). Quantification of lipid  
560 peroxidation in tissue extracts based on Fe(III)xylene orange complex formation. *Free*  
561 *Radical Biology and Medicine* **19**, 271-280.
- 562 **Hermes-Lima, M., Storey, J. M. and Storey, K. B.** (1998). Antioxidant defenses and  
563 metabolic depression. The hypothesis of preparation for oxidative stress in land snails. *Comp.*  
564 *Biochem. Physiol. B* **120**, 437-448.

- 565 **Jena, K. B., Verlecar, X. N. and Chainy, G. B. N.** (2009). Application of oxidative stress  
566 indices in natural populations of *Perna viridis* as biomarker of environmental pollution. *Mar.*  
567 *Pollut. Bull.* **58**, 107-113.
- 568 **Joanisse, D. R. and Storey, K. B.** (1996). Oxidative damage and antioxidants in *Rana*  
569 *syvatica*, the freeze-tolerant wood frog. *Am. J. Physiol.* **271**, R545-R553.
- 570 **Köhler, Zanger, Eckwert and Einfeldt.** (2000). Selection favours low hsp70 levels in  
571 chronically metal-stressed soil arthropods. *J. Evol. Biol.* **13**, 569-582.
- 572 **Köhler, H. R., Lazzara, R., Dittbrenner, N., Capowiez, Y., Mazzia, C. and Triebkorn,**  
573 **R.** (2009). Snail phenotypic variation and stress proteins: do different heat response strategies  
574 contribute to Waddington's widget in field populations? *J. Exp. Zool. B* **312**, 136-147.
- 575 **Kregel, K. C.** (2002). Invited review: heat shock proteins: modifying factors in physiological  
576 stress responses and acquired thermotolerance. *J. Appl. Physiol.* **92**, 2177-2186.
- 577 **Lindquist, S.** (1986). The heat-shock response. *Ann. Rev. Biochem.* **55**, 1151-1191.
- 578 **Lindquist, S. and Craig, E.** (1988). The heat-shock proteins. *Ann. Rev. Genet.* **22**, 631-677.
- 579 **Luna-Acosta, A., Bustamante, P., Godefroy, J., Fruitier-Arnaudin, I. and Thomas-**  
580 **Guyon, H.** (2010). Seasonal variation of pollution biomarkers to assess the impact on the  
581 health status of juvenile Pacific oysters *Crassostrea gigas* exposed in situ. *Environ. Sci.*  
582 *Pollut. Res.* **17**, 999-1008.
- 583 **Lushchak, V.** (2011). Environmentally induced oxidative stress in aquatic animals. *Aquat.*  
584 *Toxicol.* **101**, 13-30.
- 585 **Lushchak, V. I. and Bagnyukova, T. V.** (2006a). Temperature increase results in oxidative  
586 stress in goldfish tissues. 2. Antioxidant and associated enzymes. *Comp. Biochem. Physiol. C*  
587 **143**, 36-41.
- 588 **Lushchak, V. I. and Bagnyukova, T. V.** (2006b). Temperature increase results in oxidative  
589 stress in goldfish tissues. 1. Indices of oxidative stress. *Comp. Biochem. Physiol. C* **143**, 30-  
590 35.
- 591 **Lushchak, V. I., Lushchak, L. P., Mota, A. A. and Hermes-Lima, M.** (2001). Oxidative  
592 stress and antioxidant defenses in goldfish *Carassius auratus* during anoxia and  
593 reoxygenation. *Am. J. Physiol. Regul. Integr. Comp. Physiol.* **280**, R100-R107.
- 594 **Machin, J.** (1964). The Evaporation of Water from *Helix Aspersa* III. The Application of  
595 Evaporation Formulae. *J. Exp. Biol.* **41**, 783-792.
- 596 **Mayer, M. and Bukau, B.** (2005). Hsp70 chaperones: cellular functions and molecular  
597 mechanism. *Cell. Mol. Life Sci.* **62**, 670-684.

- 598 **Meister, A.** (1988). Glutathione metabolism and its selective modification. *J. Biol. Chem.*  
599 **263**, 17205-17208.
- 600 **Mizrahi, T., Heller, J., Goldenberg, S. and Arad, Z.** (2010). Heat shock proteins and  
601 resistance to desiccation in congeneric land snails. *Cell Stress Chaperones* **15**, 351-363.
- 602 **Mizrahi, T., Heller, J., Goldenberg, S. and Arad, Z.** (2012). Heat shock proteins and  
603 survival strategies in congeneric land snails (*Sphincterochila*) from different habitats. *Cell*  
604 *Stress Chaperones* **17**, 523-527.
- 605 **Monserrat, J. M., Geracitano, L. A., Pinho, G. L. L., Vinagre, T. M., Faleiros, M.,**  
606 **Alciati, J. C. and Bianchini, A.** (2003). Determination of Lipid Peroxides in Invertebrates  
607 Tissues Using the Fe(III) Xylenol Orange Complex Formation. *Arch. Environ. Contam.*  
608 *Toxicol.* **45**, 177-183.
- 609 **Morimoto, R. I.** (1998). Regulation of the heat shock transcriptional response: cross talk  
610 between a family of heat shock factors, molecular chaperones, and negative regulators. *Genes*  
611 *Dev.* **12**, 3788-3796.
- 612 **Nowakowska, A., Caputa, M. and Rogalska, J.** (2010). Natural aestivation and antioxidant  
613 defence in *Helix pomatia*: effect of acclimation to various external conditions. *J. Mollus. Stud.*  
614 **76**, 354-359.
- 615 **Nowakowska, A., Caputa, M. and Rogalska, J.** (2011). Defence against oxidative stress in  
616 two species of land snails (*Helix pomatia* and *Helix aspersa*) subjected to estivation. *J. Exp.*  
617 *Zool. A* **315**, 593-601.
- 618 **Nowakowska, A., Świdarska-Kolacz, G., Rogalska, J. and Caputa, M.** (2009).  
619 Antioxidants and oxidative stress in *Helix pomatia* snails during estivation. *Comp. Biochem.*  
620 *Physiol. C* **150**, 481-486.
- 621 **Pannunzio, T. M. and Storey, K. B.** (1998). Antioxidant defenses and lipid peroxidation  
622 during anoxia stress and aerobic recovery in the marine gastropod *Littorina littorea*. *J. Exp.*  
623 *Mar. Biol. Ecol.* **221**, 277-292.
- 624 **Parsell, D. and Lindquist, S.** (1993). The function of heat-shock proteins in stress tolerance:  
625 degradation and reactivation of damaged proteins. *Ann. Rev. Genet.* **27**, 437-496.
- 626 **Pomeroy, D.** (1968). Dormancy in the land snail, *Helicella virgata* (Pulminata: Helicidae).  
627 *Aust. J. Zool.* **16**, 857-869.
- 628 **Radwan, M. A., El-Gendy, K. S. and Gad, A. F.** (2010). Biomarkers of oxidative stress in  
629 the land snail, *Theba pisana* for assessing ecotoxicological effects of urban metal pollution.  
630 *Chemosphere* **79**, 40-46.

- 631 **Ramos-Vasconcelos, G. R. and Hermes-Lima, M.** (2003). Hypometabolism, antioxidant  
632 defenses and free radical metabolism in the pulmonate land snail *Helix aspersa*. *J. Exp. Biol.*  
633 **206**, 675-685.
- 634 **Sanchez, Y., Taulien, J., Borkovich, K. and Lindquist, S.** (1992). Hsp104 is required for  
635 tolerance to many forms of stress. *EMBO* **11**, 2357.
- 636 **Scheil, A. E., Köhler, H.-R. and Triebkorn, R.** (2011). Heat tolerance and recovery in  
637 Mediterranean land snails after pre-exposure in the field. *J. Mollus. Stud.* **77**, 165-174.
- 638 **Sies, H.** (1994). Strategies of antioxidant defense. In *EJB Reviews 1993*, vol. 1993, pp. 101-  
639 107: Springer Berlin Heidelberg.
- 640 **Sies, H.** (1997). Oxidative stress: oxidants and antioxidants. *Exp. Physiol.* **82**, 291-295.
- 641 **Sørensen, J., Dahlggaard, J. and Loeschcke, V.** (2001). Genetic variation in thermal  
642 tolerance among natural populations of *Drosophila buzzatii*: down regulation of Hsp70  
643 expression and variation in heat stress resistance traits. *Funct. Ecol.* **15**, 289-296.
- 644 **Storey, K. B.** (1996). Oxidative stress: animal adaptations in nature. *Braz. J. Med. Biol. Res.*  
645 **29**, 1715-1733.
- 646 **Storey, K. B.** (2002). Life in the slow lane: molecular mechanisms of estivation. *Comp.*  
647 *Biochem. Physiol. A Mol. Integr. Physiol.* **133**, 733-754.
- 648 **Storey, K. B. and Storey, J.** (2011). Heat shock proteins and hypometabolism: adaptive  
649 strategy for proteome preservation. *Res. Rep. Biol.* **2**, 57-68.
- 650 **Tomanek, L. and Somero, G. N.** (2002). Interspecific-and acclimation-induced variation in  
651 levels of heat-shock proteins 70 (hsp70) and 90 (hsp90) and heat-shock transcription factor-1  
652 (HSF1) in congeneric marine snails (genus *Tegula*): implications for regulation of hsp gene  
653 expression. *J. Exp. Biol.* **205**, 677-685.
- 654 **Troschinski, S., Di Lellis, M. A., Sereida, S., Hauffe, T., Wilke, T., Triebkorn, R. and**  
655 **Köhler, H.-R.** (2014). Intraspecific variation in cellular and biochemical heat response  
656 strategies of Mediterranean *Xeropicta derbentina* [Pulmonata, Hygromiidae]. *PloS one* **9**,  
657 e86613.
- 658 **Verlecar, X., Jena, K. and Chainy, G.** (2007). Biochemical markers of oxidative stress in  
659 *Perna viridis* exposed to mercury and temperature. *Chem. Biol. Interact.* **167**, 219-226.
- 660 **Yom-Tov, Y.** (1971). Body temperature and light reflectance in two desert snails. *J. Mollus.*  
661 *Stud.* **39**, 319-326.

662

663

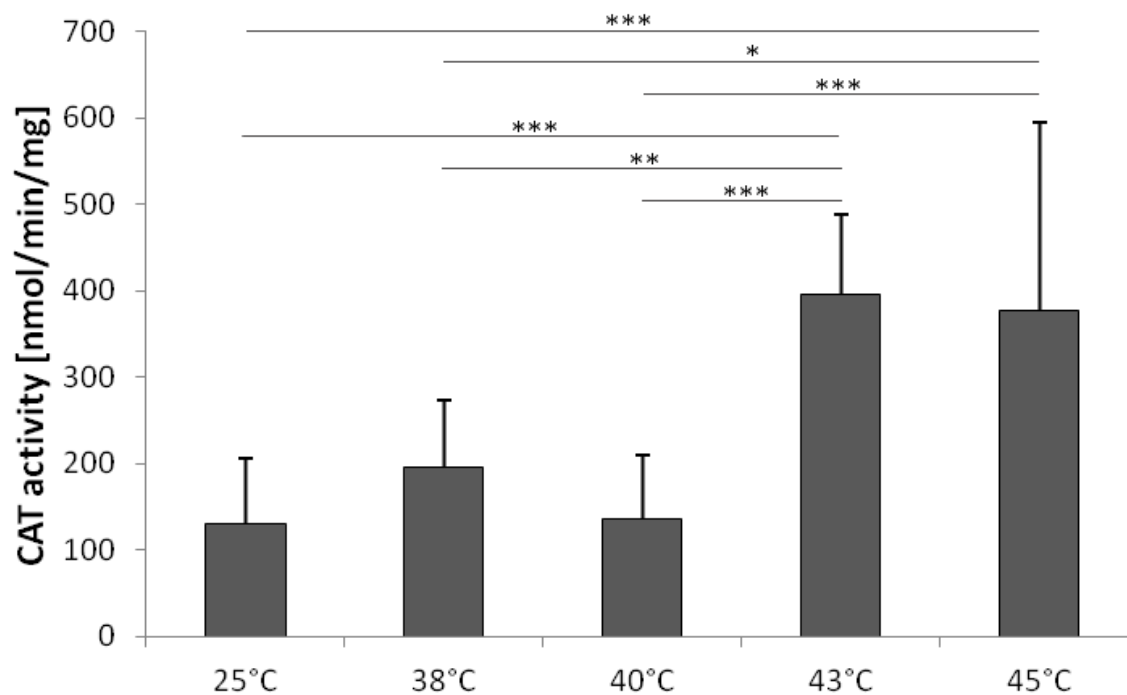

664  
 665 Fig. 1. **Catalase activity in *X. derbentina* after different temperature treatments** (means +  
 666 s.d., n=10). Asterisks indicate significant differences between the groups:  $0.01 < p \leq 0.05$  (\*),  
 667  $0.001 < p \leq 0.01$  (\*\*);  $p \leq 0.001$  (\*\*\*)  
 668  
 669

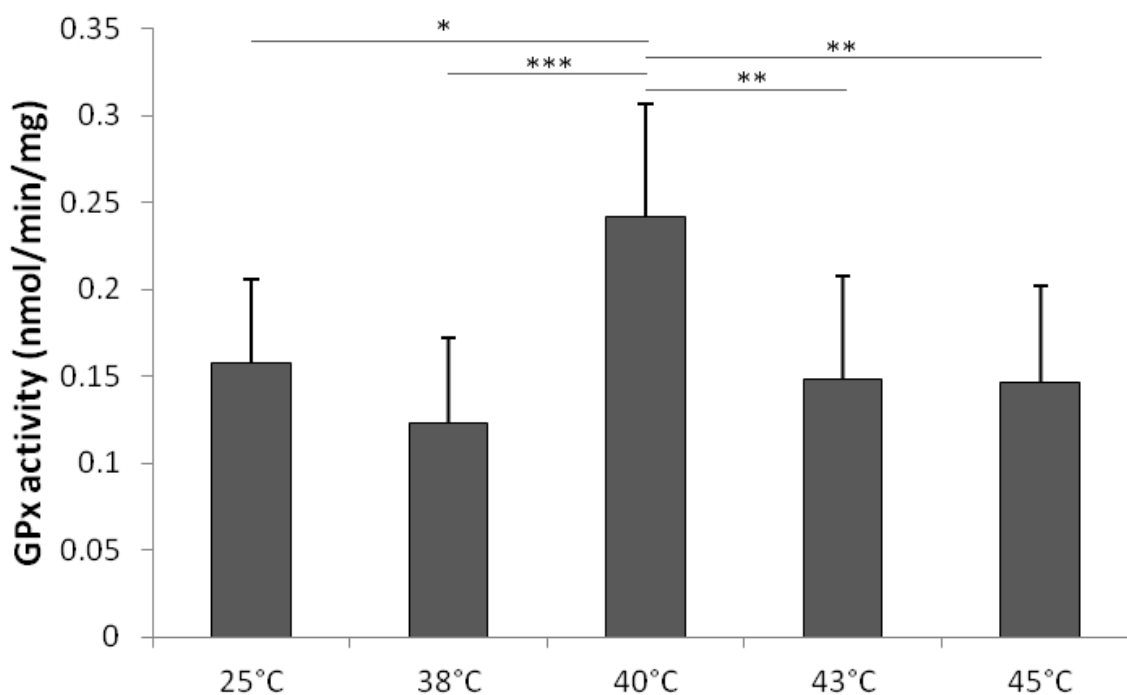

670  
 671 Fig. 2. **Glutathione peroxidase activity in *X. derbentina* after different temperature**  
 672 **treatments** (means + s.d., n=10). Asterisks indicate significant differences between the  
 673 groups:  $0.01 < p \leq 0.05$  (\*),  $0.001 < p \leq 0.01$  (\*\*);  $p \leq 0.001$  (\*\*\*)



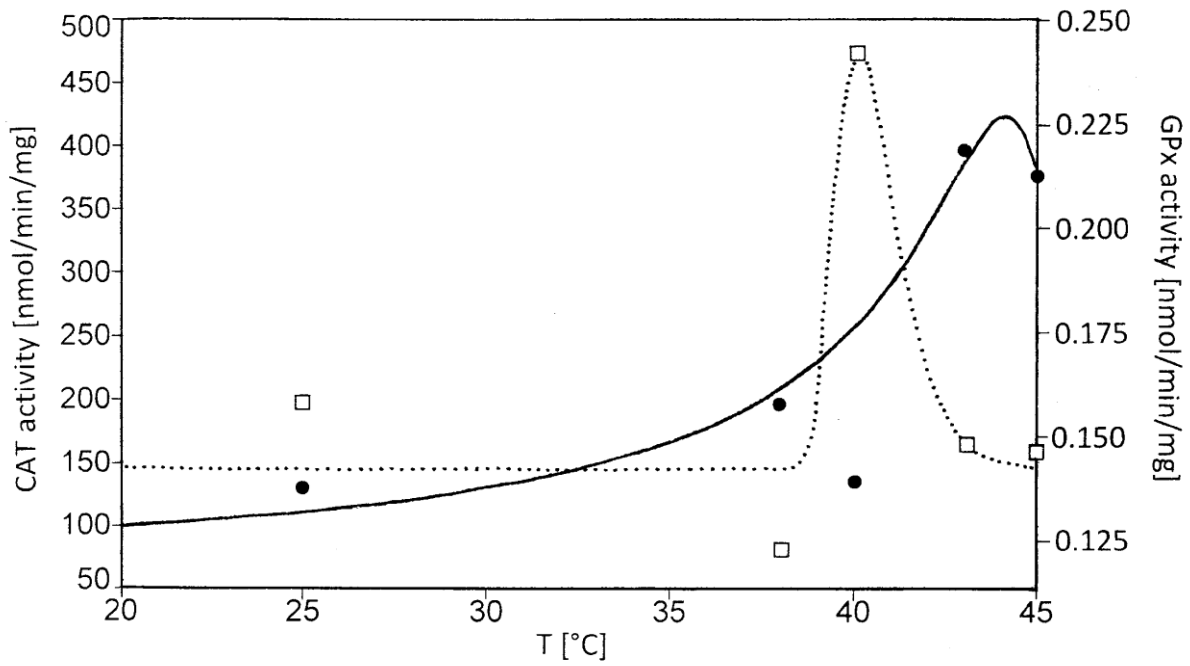

674

675 Fig. 3. Non-linear regression analysis of catalase (black dots, solid line, left scale, CAT)  
 676 and glutathione peroxidase (squares, dotted line, right scale, GPx) activities vs.

677 temperature (T).  $(\text{CAT})^{-1} = 0.011 - (7.369 \cdot 10^{-7}) T^{2.5} + 3.757 e^T$  with  $r^2 = 0.773$

678  $\text{GPx} = 0.142 \exp [(T / 31.370) + 1.274 - (31.371 \exp ((T / 40.063) + 0.242) / 31.370)]$  with  
 679  $r^2 = 0.924$

680

681

682

683

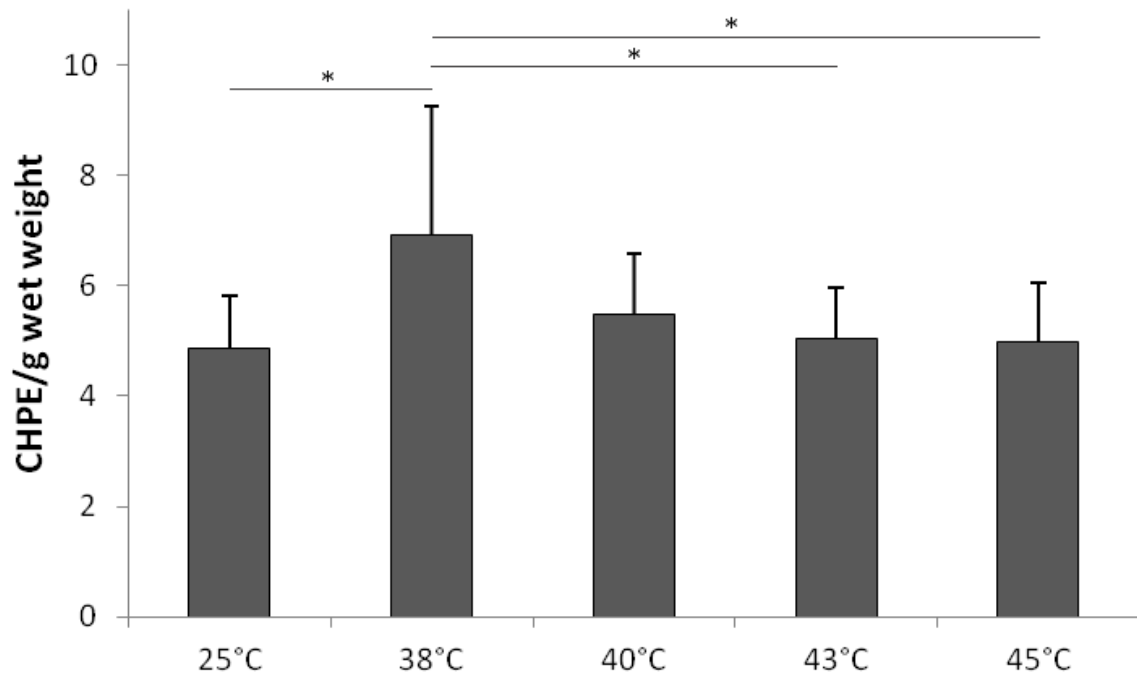

684

685 Fig. 4. Levels of lipid peroxides (expressed as CHPE per gram wet weight) in *X.*  
 686 *derbentina* after different temperature treatments (means + s.d., n=10). Asterisks indicate  
 687 significant differences between the groups:  $0.01 < p \leq 0.05$  (\*).

688

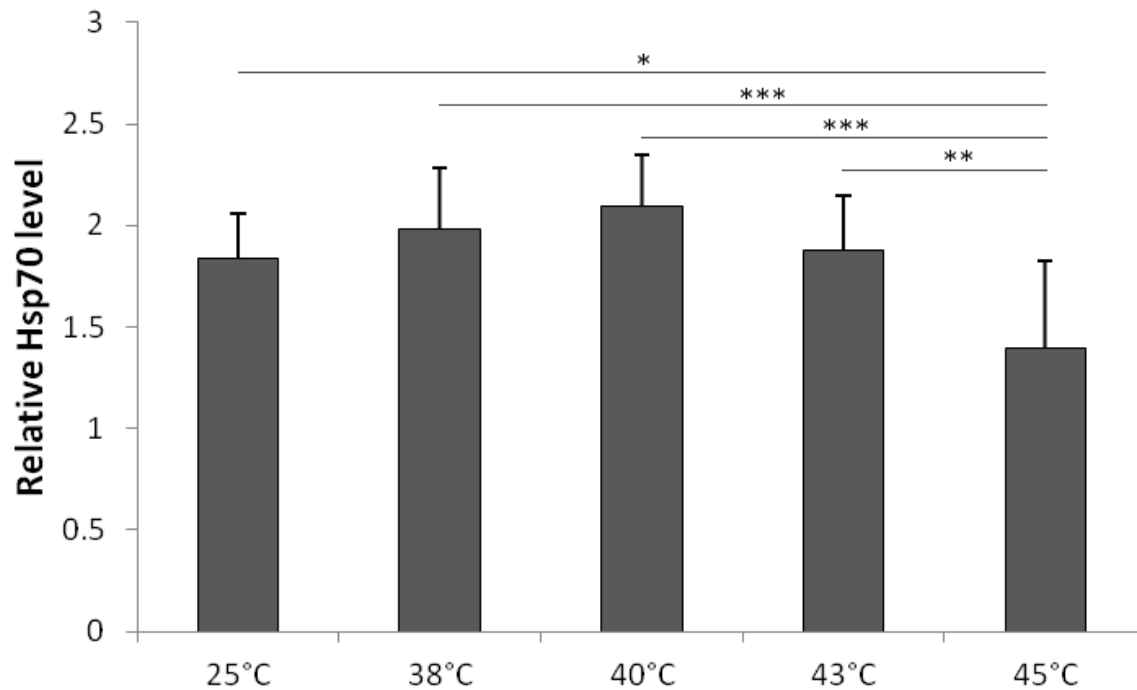

689

690 Fig. 5. Relative Hsp70 levels in *X. derbentina* after different temperature treatments  
 691 (means + s.d., n=10). Asterisks indicate significant differences between the groups:  $0.01 < p \leq$   
 692  $0.05$  (\*),  $0.001 < p \leq 0.01$  (\*\*);  $p \leq 0.001$  (\*\*\*)).
